# Supplementary material for: Intravesical Mycobacterium brumae triggers both local and systemic immunotherapeutic responses against bladder cancer in mice
Source: PubMed Central journal article supplement (PMC6180069; doi:10.1038/s41598-018-33253-w), 2018-10-10

# **Intravesical *Mycobacterium brumae* triggers both local and systemic immunotherapeutic responses against bladder cancer in mice**

**Estela Noguera-Ortega<sup>1</sup>, Rosa M. Rabanal<sup>2</sup>, Elisabet Gómez-Mora<sup>3</sup>, Cecilia Cabrera<sup>3</sup>, Marina Luquin<sup>1</sup>, and Esther Julián<sup>1,\*</sup>**

<sup>1</sup>Departament de Genètica i de Microbiologia, Facultat de Biociències, Universitat Autònoma de Barcelona, 08193, Bellaterra, Barcelona, Spain.

<sup>2</sup>Unitat de Patologia Murina i Comparada, Departament de Medicina i Cirurgia Animals, Facultat de Veterinària, Universitat Autònoma de Barcelona, 08193, Bellaterra, Barcelona, Spain.

<sup>3</sup>AIDS Research Institute IrsiCaixa, Institut de Recerca en Ciències de la Salut Germans Trias i Pujol (IGTP), Hospital Germans Trias i Pujol, Universitat Autònoma de Barcelona, 08916, Badalona, Barcelona, Catalonia, Spain.

\*Correspondence: E-mail: [esther.julian@uab.cat](mailto:esther.julian@uab.cat); Tel.: (+34) 93 581 4870

**Supplementary Figure 1.** Gating strategy to analyze the quantity and phenotype of immune cells that infiltrated the bladders.

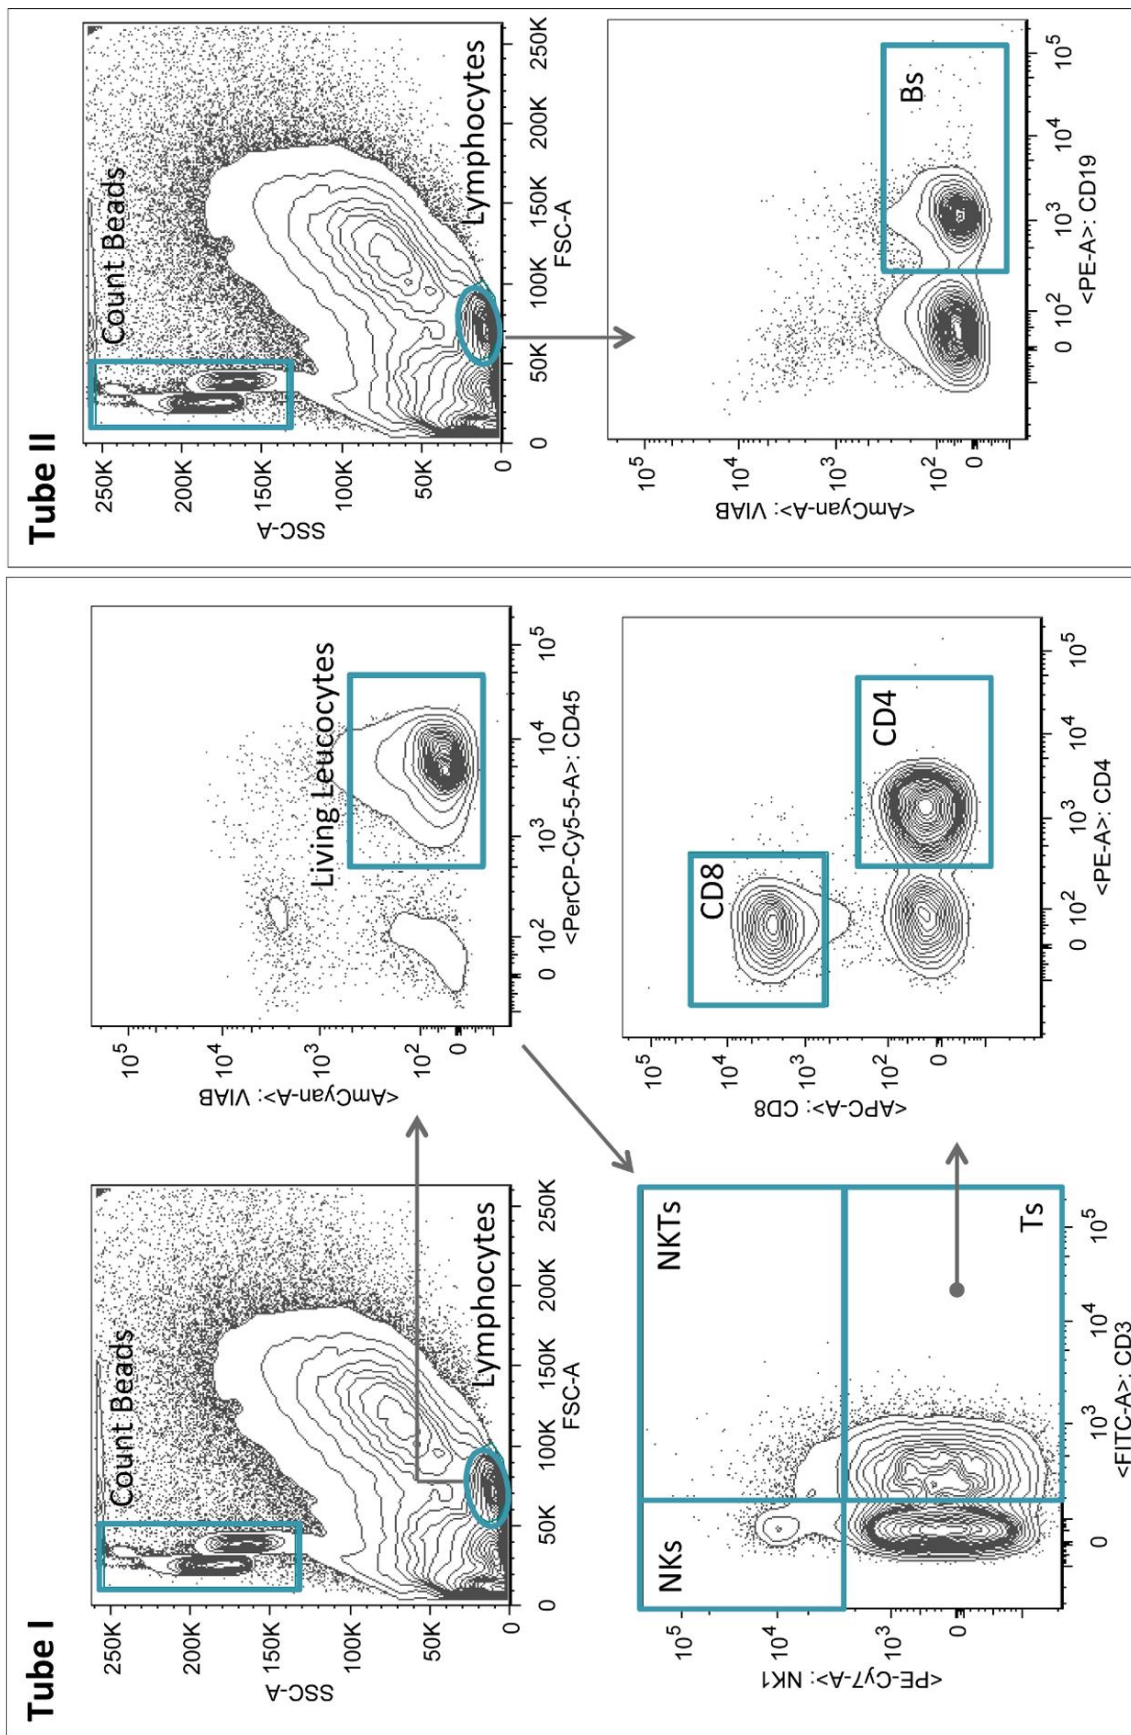

**Supplementary Figure 2.** Macromolecules detected in pooled urine taken at different time-points from mice.

IL-6, KC, VEGF, MIP-2 and MMP-9 were detected in pooled urine samples taken from mice at different time points. Dots plus solid lines represent tumor-bearing mice treated with emulsified preparations and triangles plus dotted lines represent animals treated with non-emulsified preparations. The different groups of animals are represented by different colors: grey triangles represent the healthy (H) mice, tumor-bearing-mice not receiving mycobacteria treatment (No-bact) are represented by black symbols, BCG-treated mice by blue symbols and *M. brumae*-treated mice by red symbols.

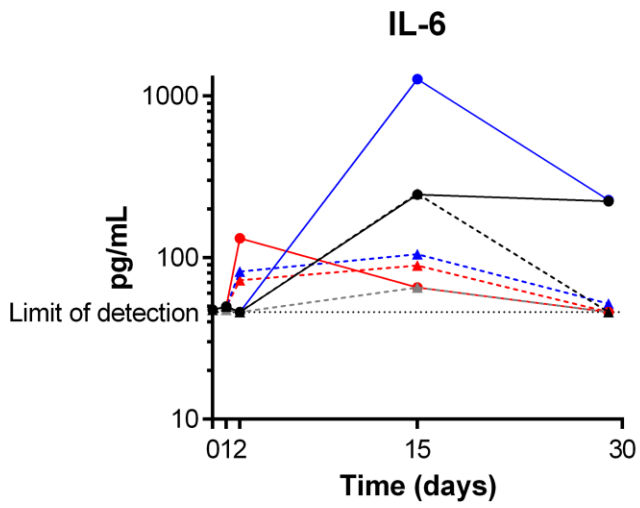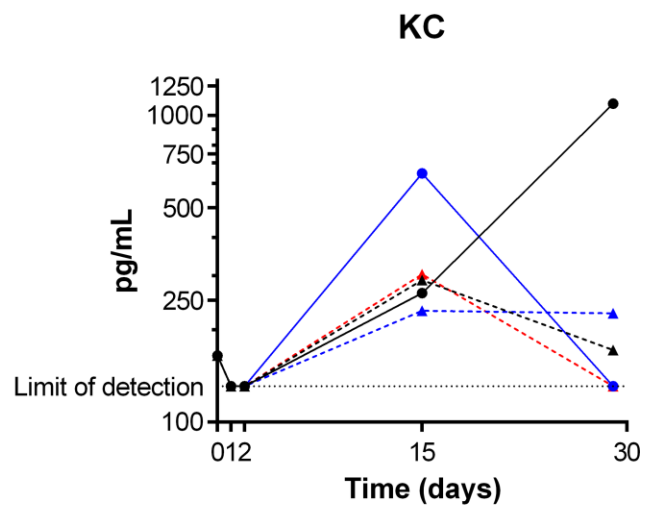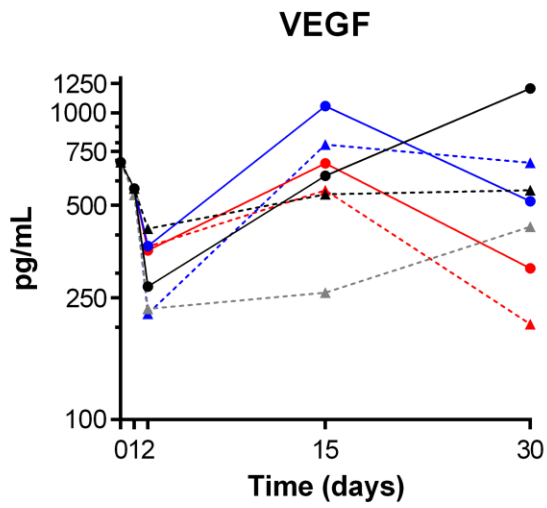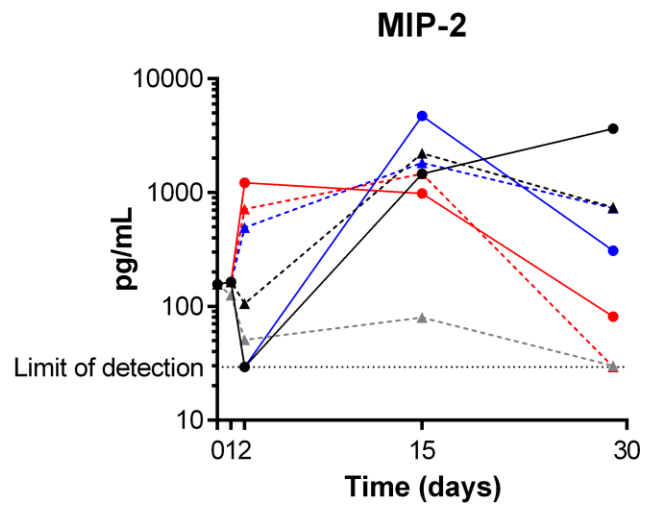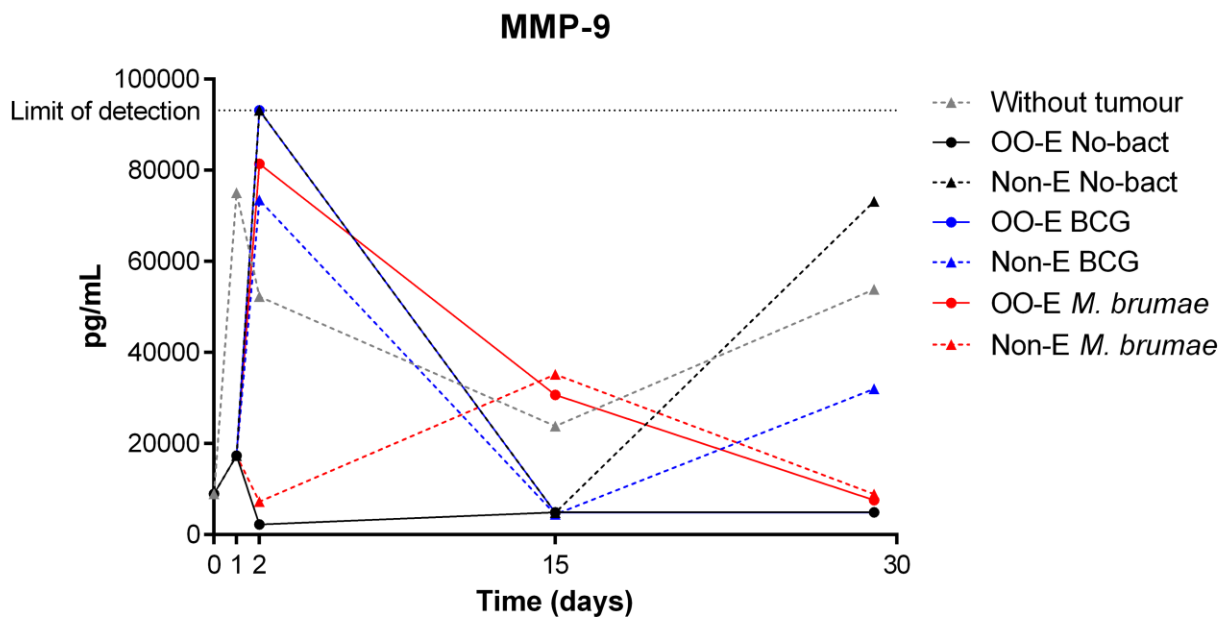

Supplement: 41598_2018_33253_MOESM1_ESM.pdf [file 41598_2018_33253_MOESM1_ESM.pdf]
